# Supplementary material for: Intrinsic anionic rearrangement by extrinsic control: transition of RS and CRS in thermally elevated TiN/HfO2/Pt RRAM
Source: Royal Society of Chemistry journal article supplement (doi:10.1039/c7nr06628g), 2017-01-01
Supplement: c7nr06628g1.pdf [file c7nr06628g1.pdf]

## Supporting Information

### **Intrinsic anionic rearrangement by extrinsic control: Transition of RS and CRS in thermally elevated TiN/HfO<sub>2</sub>/Pt RRAM**

*Writam Banerjee<sup>\*a,b</sup>, Wu Fa Cai<sup>a,b</sup>, Xiaolong Zhao<sup>a,b</sup>, Qi Liu<sup>a,b</sup>, Hangbing Lv<sup>a,b</sup>, Shibing Long<sup>a,b</sup> and Ming Liu<sup>a,b</sup>*

**Keywords:** resistive random access memory (RRAM); crossbar; resistive switching (RS); complementary resistive switching (CRS); nonlinearity

**Figure S1: The SET compliance dependent behaviors.**

**Figure S2: Effect of RESET voltage on CRS.**

**Figure S3: Device-to-device performance analysis.**

**Figure S4: The cycle-to-cycle CRS switching degradation at 85°C.**

**Figure S5: Thermal effect on HRS.**

**Video file S6: The real-time measurement video of the CRS at 30°C.**

**Video file S7: The real-time measurement video of the CRS at 100°C.**

**Table S8: Comparison with the reported results.**

---

<sup>a</sup>Key Laboratory of Microelectronic Devices & Integrated Technology, Institute of Microelectronics, Chinese Academy of Sciences, No. 3 BeiTuCheng West Road, ChaoYang District, Beijing 100029, China.

<sup>b</sup>Jiangsu National Synergetic Innovation Center for Advanced Materials (SICAM), Nanjing 210009, China.

\*E-mail: writam.banerjee@gmail.com, writam.banerjee@ime.ac.cn

Tel: 86-10-82995582; Fax: 86-10-82995583

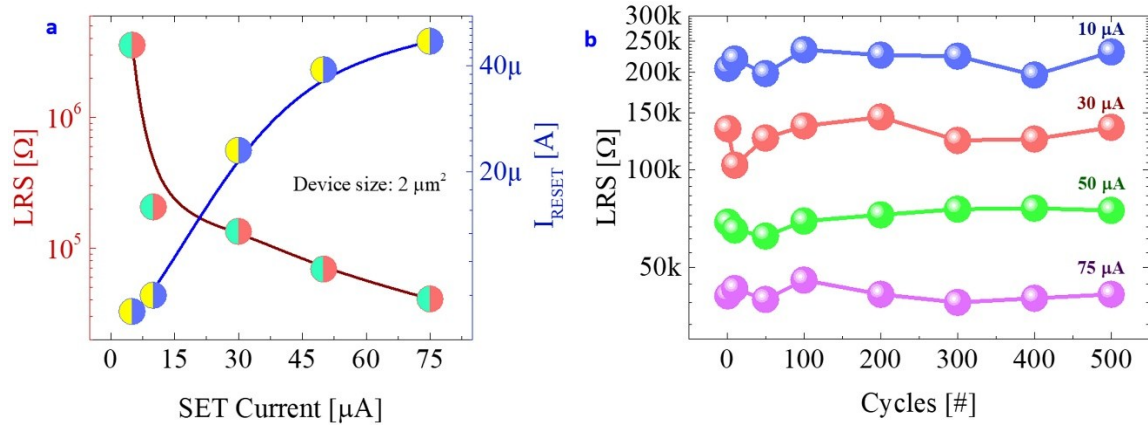

**Figure S1: The SET compliance dependent behaviors. (a)** The LRS is following an increasing and the  $I_{\text{RESET}}$  is following a decreasing trend with the decreasing  $I_{\text{CC}}$ . **(b)** The different levels are showing good stability over switching cycles.

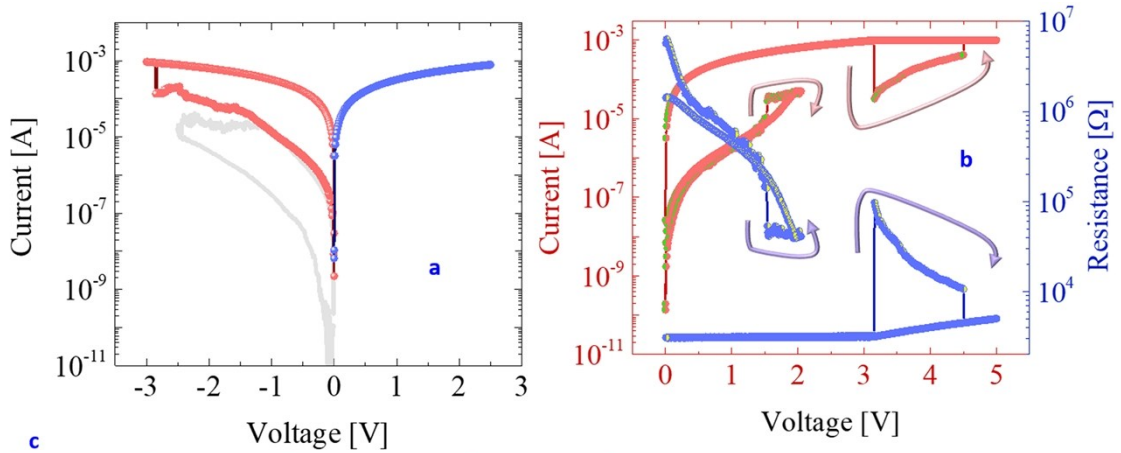

| Type | $-V$  | Procedure          | Current    | CRS: $I-V$ switching direction                                       | Status       |
|------|-------|--------------------|------------|----------------------------------------------------------------------|--------------|
| 1    | RESET | Voltage controlled | 50 $\mu$ A | Clockwise switching:<br>HRS $\rightarrow$ LRS $\rightarrow$ HRS      | Controllable |
| 2    | SET   | RESET failure      | > 1 mA     | Anti-clockwise switching:<br>LRS $\rightarrow$ HRS $\rightarrow$ LRS | Stuck to LRS |

**Figure S2: Effect of RESET voltage on CRS.** (a) After the 2<sup>nd</sup> forming process, if the device is operated higher than -2.5 V, then instead of resetting the device another SET switching in negative voltage is observed. In this situation the nano-filament growth direction is reverse way than the normal positive bias SET. (b) A reverse CRS process is achieved with a positive bias due to the RESET failure with negative bias. (c) Unfortunately, the reverse CRS is not stable and is prone to stuck to the LRS.

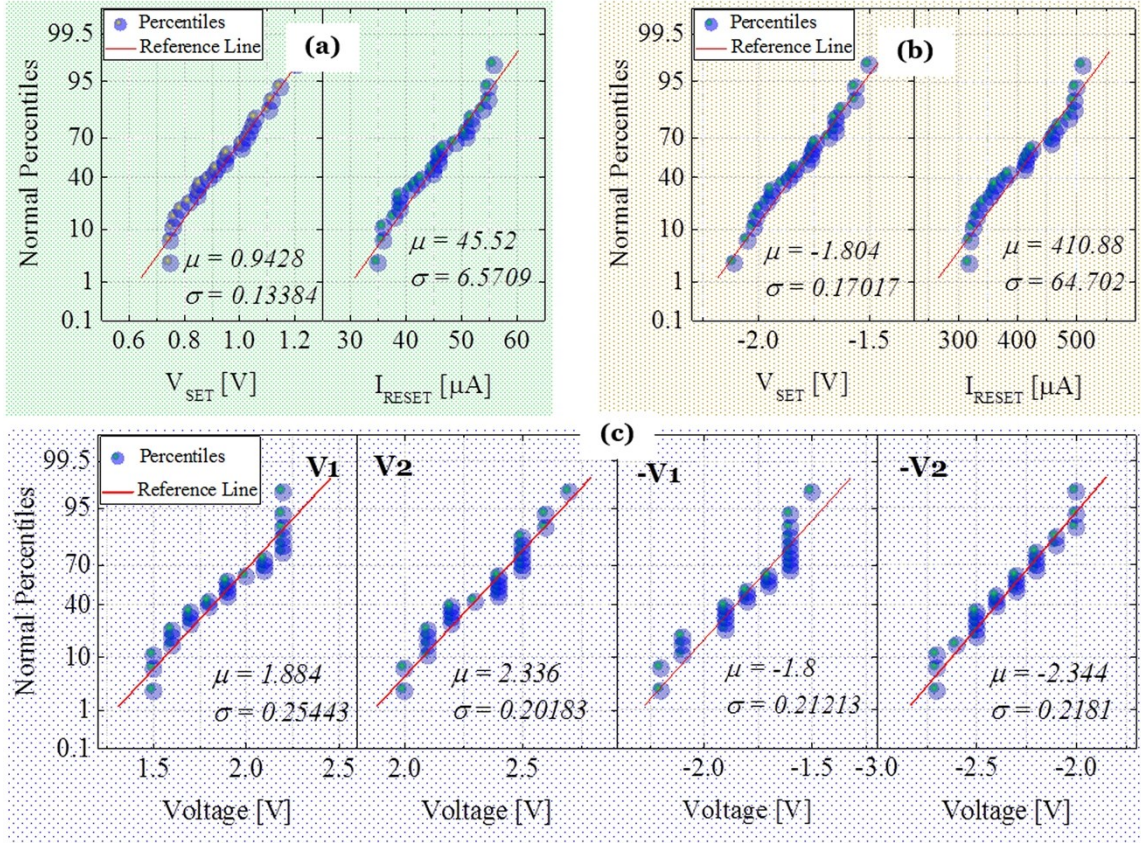

**Figure S3: Device-to-device performance analysis.** The device-to-device variation of the  $V_{SET}$  and  $I_{RESET}$  for the (a) 1<sup>st</sup>-RS mode and (b) 2<sup>nd</sup>-RS mode. Both the  $V_{SET}$  and  $I_{RESET}$  is higher for the 2<sup>nd</sup>-RS as compare to the 1<sup>st</sup>-RS. In addition, the  $V_{SET}$  is indicating different polarity in-between 1<sup>st</sup> and 2<sup>nd</sup> RS modes. (c) The OFF to ON and ON to OFF transition voltage variation for the CRS mode. Here,  $V1$  is the change from the OFF state to ON state in the positive bias,  $V2$  is the change from the ON state to OFF state in the positive bias,  $-V1$  is the change from the OFF state to ON state in the negative bias, and  $-V2$  is the change from the ON state to OFF state in the negative bias.

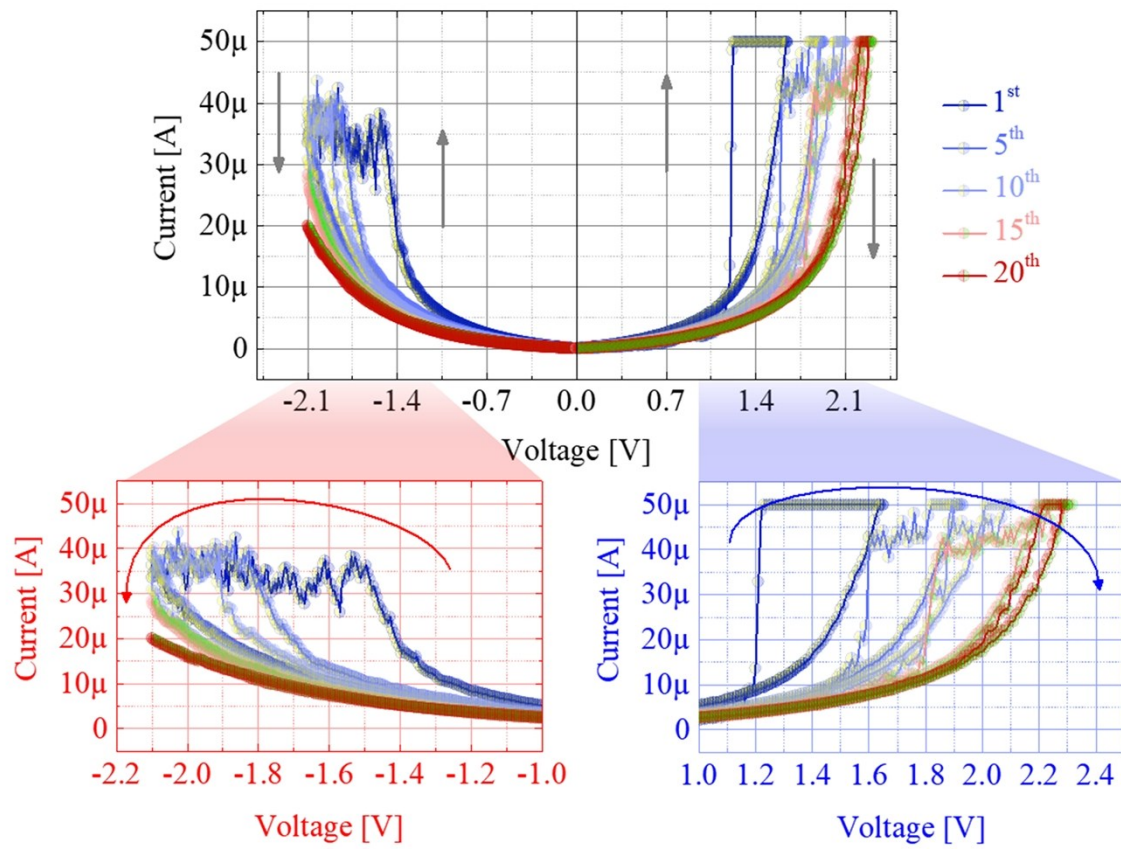

**Figure S4: The cycle-to-cycle CRS switching degradation at 85°C.** The high temperature CRS process is not so stable like room temperature.



Evolution of semiconducting nano-filament  
by anionic rearrangement

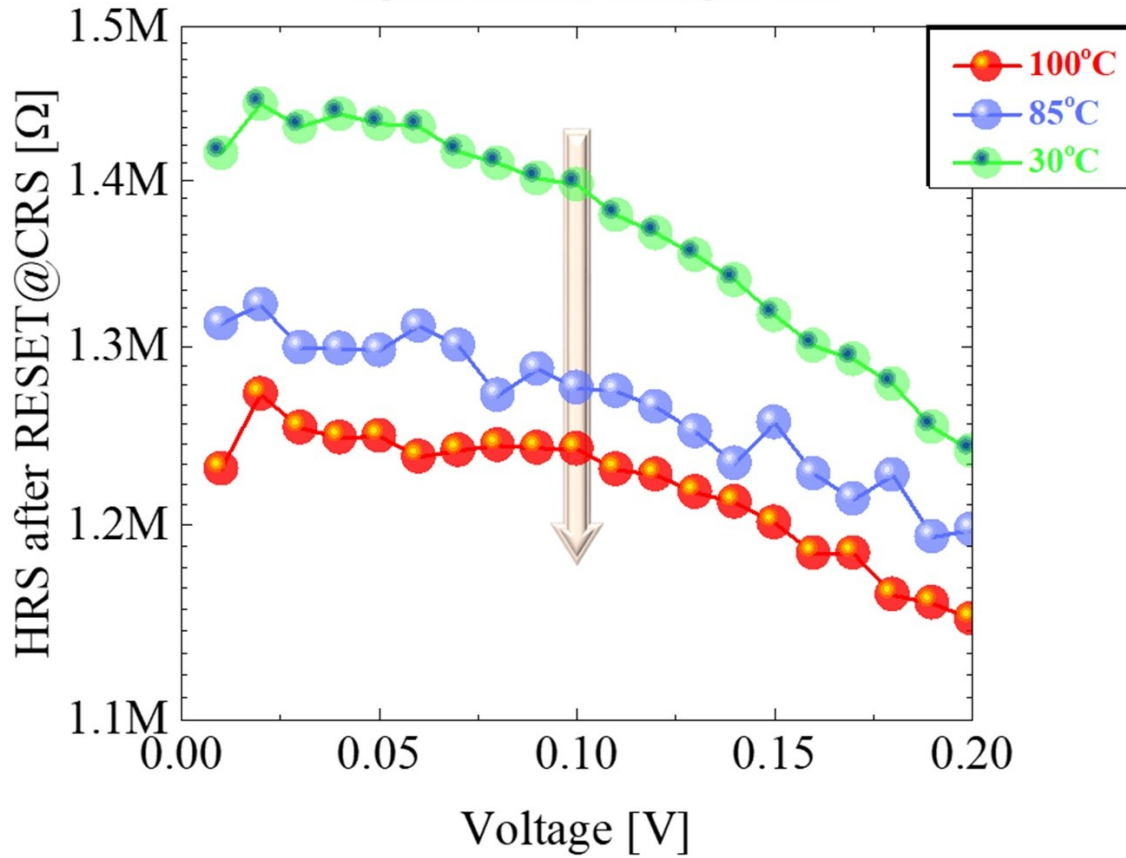

**Figure S5: Thermal effect on HRS.** The temperature dependent HRS is showing a non-metallic filament formation in the TiN/HfO<sub>2</sub>/Pt X-point devices.

**Supplementary video files S6:** The real-time measurement video of the CRS phenomena at 30°C in the HfO<sub>2</sub>-based X-point.

**Supplementary video files S7:** The real-time measurement video of the CRS phenomena at high temperature of 100°C, in the HfO<sub>2</sub>-based X-point.

Supplementary Table S8:

Table S7: The comparison of the reported results of the RRAM devices operated with CRS mode.

| Ref.                  | Structure | Stack                                                                                                                  | Extra electrode     | Forming              | Complementary Resistive Switching Parameters |                     |                        |          |
|-----------------------|-----------|------------------------------------------------------------------------------------------------------------------------|---------------------|----------------------|----------------------------------------------|---------------------|------------------------|----------|
|                       |           |                                                                                                                        |                     |                      | $I_{CC}$ [mA]                                | Read $\Delta V$ [V] | Storage $\Delta V$ [V] | $T$ [°C] |
| → This work           | X-point   | Pt/HfO <sub>2</sub> /TiN/Pt                                                                                            | No                  | +2.5 V @ 10 $\mu$ A  | 0.01 – 0.5                                   | 0.5 – 1.5           | 1.0 – 4.0              | RT – 150 |
| Wouters et al. [20]   | 1R        | TiN/HfO <sub>2</sub> /Hf/HfO <sub>2</sub> /TiN                                                                         | Hf                  | --                   | 3.0                                          | 0.8                 | 1.1                    | RT       |
| Ambrogio et al. [21]  | 1R        | TiN/HfO <sub>2</sub> /TiN/HfO <sub>2</sub> /TiN                                                                        | TiN                 | +1 V @ 500 $\mu$ A   | 0.5                                          | 0.5                 | 1.0                    | RT       |
| Soni et al. [19]      | 1R        | Pt/SiO <sub>x</sub> /Ge <sub>0.3</sub> Se <sub>0.7</sub> /Cu/Ge <sub>0.3</sub> Se <sub>0.7</sub> /SiO <sub>x</sub> /Pt | Cu                  | +0.2 V @ 100 $\mu$ A | 1.0                                          | 0.2                 | 0.3                    | RT       |
| Linn et al. [11]      | 1R        | Pt/solid electrolyte/Cu/solid electrolyte/Pt                                                                           | Cu                  | --                   | 0.8                                          | 0.7                 | 1.0                    | RT       |
| Tseng et al. [32]     | 1R        | TiN/ZnO/SiO <sub>x</sub> /ZnO/Pt                                                                                       | No                  | +9 V @ 1 mA          | 20                                           | 0.7                 | 1.5                    | RT       |
| Yang et al. [27]      | X-point   | Pd/TaO <sub>y</sub> /Ta <sub>2</sub> O <sub>5-x</sub> /Pd                                                              | No                  | -4 V                 | 1.5                                          | 1.5                 | 2.0                    | RT       |
| Wang et al. [12]      | X-point   | Ti/TiO <sub>x</sub> /Cu/TiO <sub>x</sub> /Ti                                                                           | Cu                  | +3 V @ 1 mA          | 0.7                                          | 0.3                 | 1.0                    | RT       |
| Nardi et al. [24]     | 1R        | TiN/HfO <sub>x</sub> /TiN                                                                                              | No                  | --                   | 3.0                                          | 0.7                 | 1.0                    | RT       |
| Banerjee et al. [35]  | 3D VRRAM  | TiN/TiO <sub>x</sub> /Al <sub>2</sub> O <sub>3</sub> /IrO <sub>x</sub>                                                 | No                  | +10 V @ 100 $\mu$ A  | 0.09                                         | 0.5                 | 9.0                    | RT       |
| Lee et al. [16]       | 1R        | Pt/ZrO <sub>x</sub> /HfO <sub>x</sub> /TiN/ZrO <sub>x</sub> /HfO <sub>x</sub> /Pt                                      | TiN                 | +2V @ 1 mA           | 0.5                                          | 0.5                 | 1.0                    | RT       |
| Chen et al. [14]      | 1R        | Pt/AlN/TiN/AlN/TiN/Pt                                                                                                  | TiN                 | --                   | 1.0                                          | 1.5                 | 3.0                    | RT       |
| Zhang et al. [26]     | 1R        | TiN/HfO <sub>x</sub> /TiN                                                                                              | No                  | --                   | 5.0                                          | 0.4                 | 1.0                    | RT       |
| Jana et al. [29]      | 1R        | TiN/Al <sub>2</sub> O <sub>3</sub> /GdO <sub>x</sub> /IrO <sub>x</sub>                                                 | No                  | -3 V @ 1 mA          | 1.0                                          | 1.0                 | 4.0                    | RT       |
| Rosezin et al. [15]   | 1R        | Pt/SiO <sub>2</sub> /Cu/Pt/Cu/SiO <sub>2</sub> /Ti/Pt                                                                  | Cu/Pt/Cu            | --                   | 14.0                                         | 2.0                 | 4.0                    | RT       |
| Lee et al. [13]       | 1R        | Pt/Ta <sub>2</sub> O <sub>5-x</sub> /Ta/Ta <sub>2</sub> O <sub>5-x</sub> /Pt                                           | Ta                  | +4 V @ 10 mA         | 20.0                                         | 1.0                 | 2.0                    | RT       |
| Chai et al. [34]      | 1R        | Ag/amorphous-carbon/CNT/Ag                                                                                             | No                  | --                   | 0.08                                         | 5.0                 | 10.0                   | RT       |
| Zhang et al. [30]     | 1R        | TiN/Al <sub>2</sub> O <sub>3</sub> /HfO <sub>x</sub> /TiN                                                              | No                  | +0.6 V @ 100 $\mu$ A | 0.1                                          | 0.3                 | 1.4                    | RT       |
| Bae et al. [33]       | 1R        | Pt/TiO <sub>x</sub> /TiO <sub>x</sub> Ny/TiO <sub>x</sub> /Pt                                                          | TiO <sub>x</sub> Ny | -10 V @ 10 $\mu$ A   | 0.1                                          | 0.5                 | 1.0 – 3.0              | RT       |
| Tang et al. [31]      | 1R        | TiN/TiNxOy/TiO <sub>2-x</sub> /Pt                                                                                      | No                  | -2 V                 | 10.0                                         | 0.2                 | 1.2                    | RT       |
| Lin et al. [17]       | 1R        | Pt/ZnO/ZnWO <sub>x</sub> /W/ZnWO <sub>x</sub> /ZnO/Pt                                                                  | W                   | --                   | 10.0                                         | 0.5                 | 2.0                    | RT       |
| Schmelzer et al. [23] | 1R        | TaTaO <sub>x</sub> /Pt                                                                                                 | No                  | --                   | 4.0                                          | 2.0                 | 4.0                    | RT       |

R: resistor; 2D: two-dimensional; 3D: three-dimensional; X: cross;  $I_{CC}$ : current compliance; T: temperature; RT: room temperature
